# Supplementary material for: Mesoporous Ca–Mn–O as an efficient scavenger toward organic pollutants and heavy metals: ion exchange provoking ultrafast Fenton-like reaction based on the synergy of alkaline earth/transition metals
Source: Royal Society of Chemistry journal article supplement (doi:10.1039/c8ta01203b), 2018-01-01
Supplement: c8ta01203b1.pdf [file c8ta01203b1.pdf]

# Mesoporous Ca-Mn-O as Efficient Scavenger toward Organic Pollutants and Heavy Metals: Ion Exchange Provoking Ultrafast Fenton-like Reaction based on the Synergy of Alkaline Earth/Transition Metals

Yali Weng<sup>a,b</sup>, Zhenzhang Weng<sup>a,b</sup>, Zhiyu Liang<sup>a,b</sup>, Haixia Lyu<sup>a,b</sup>, Zanyong Zhuang<sup>a,b\*</sup>, Yan  
Yu<sup>a,b\*</sup>

<sup>a</sup> College of Materials Science and Engineering, Fuzhou University, New Campus, Minhou,  
Fujian Province 350108, China

<sup>b</sup> Key Laboratory of Eco-materials Advanced Technology (Fuzhou University), Fujian  
Province University, Fujian Province 350108, China

\*Corresponding author. Fax: +86 591 22866534;

E-mail address: zyzhuang@fzu.edu.cn, yuyan\_1972@126.com

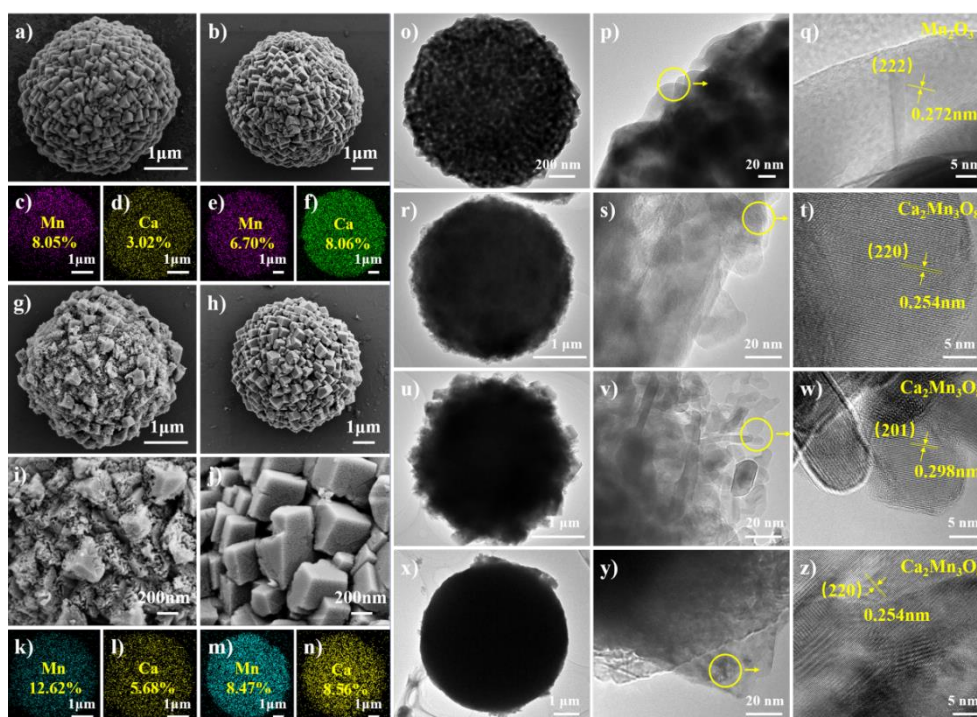

**Figure S1.** SEM images of (a)  $\text{CaMn}_2(\text{CO}_3)_3$ , (b)  $\text{CaMn}(\text{CO}_3)_2$ , (g)  $\text{CaMn}_2$  and (h)  $\text{CaMn}$ ; corresponding elemental mapping of Mn and Ca on above microspheres (c-f) and (k-n); Low- and high-magnification TEM images of (o-q)  $\text{Mn}_2\text{O}_3$ , (r-t)  $\text{CaMn}_3$ , (u-w)  $\text{CaMn}_2$ , (x-z)  $\text{CaMn}$ .

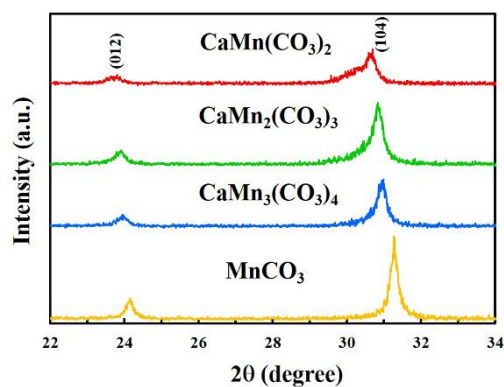

Figure S2. XRD enlarge patterns of the carbonates spheres with  $2\theta$  ranging from  $22^\circ$  to  $34^\circ$ .

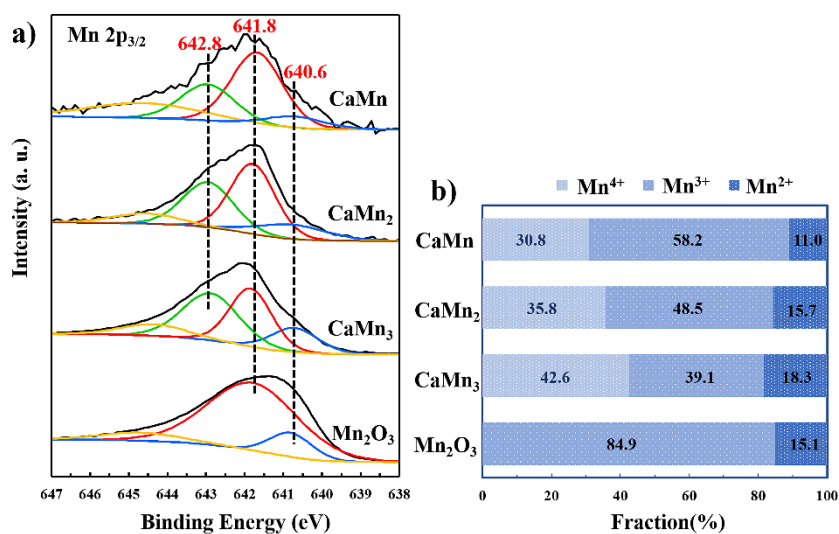

Figure S3. (a) X-ray photoelectron spectroscopy (XPS) survey spectra of Mn  $2p_{3/2}$ ; (b) Fractions of Mn species in the unreacted samples of  $Mn_2O_3$ ,  $CaMn_3$ ,  $CaMn_2$  and  $CaMn$ .

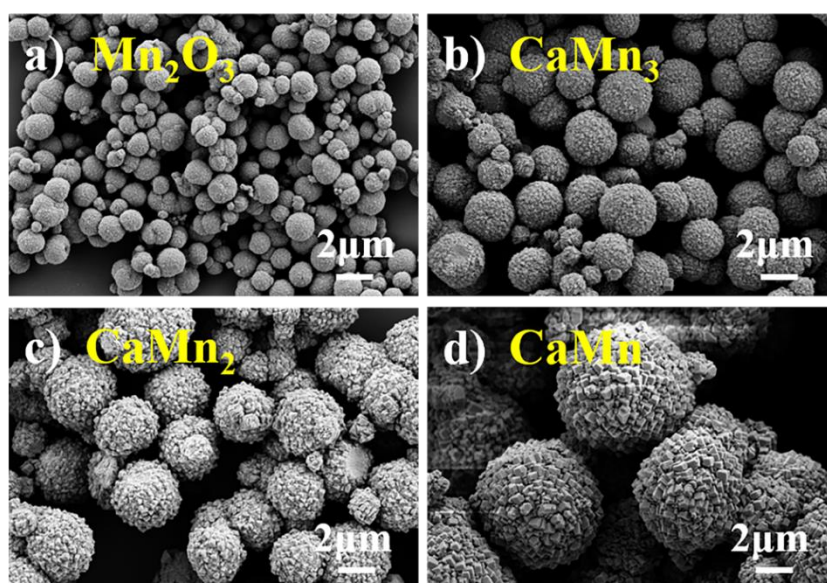

Figure S4. SEM images of (a)  $Mn_2O_3$ , (b)  $CaMn_3$ , (c)  $CaMn_2$ , and (d)  $CaMn$ .

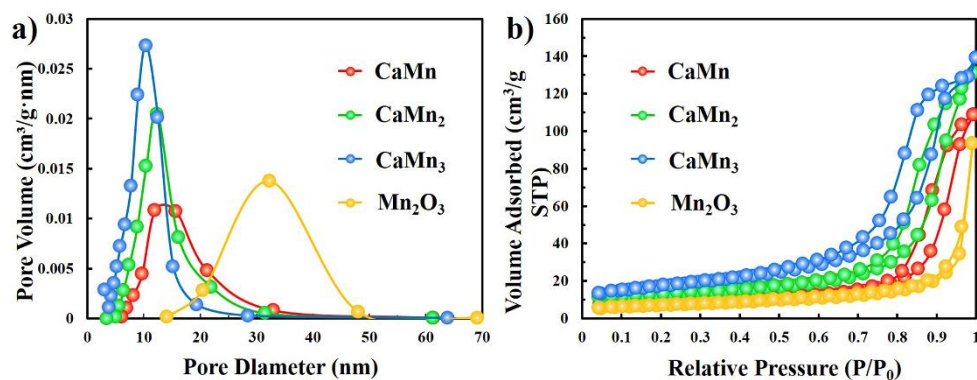

**Figure S5.** Structural characterization of Ca-Mn mixed oxides with different Ca/Mn molar ratios including pure  $\text{Mn}_2\text{O}_3$ : (a) BJH adsorption pore size distributions; (b) nitrogen sorption isotherms.

**Table S1.** Structural characteristics of  $\text{Mn}_2\text{O}_3$  and  $\text{CaMn}_x$ .

|                                | BET surface area<br>( $\text{m}^2/\text{g}$ ) | Pore volume<br>( $\text{cm}^3/\text{g}$ ) | Pore size<br>(nm) |
|--------------------------------|-----------------------------------------------|-------------------------------------------|-------------------|
| CaMn                           | 27.0                                          | 0.169                                     | 17.8              |
| CaMn <sub>2</sub>              | 45.9                                          | 0.214                                     | 14.6              |
| CaMn <sub>3</sub>              | 59.6                                          | 0.201                                     | 10.4              |
| Mn <sub>2</sub> O <sub>3</sub> | 19.6                                          | 0.246                                     | 30.8              |

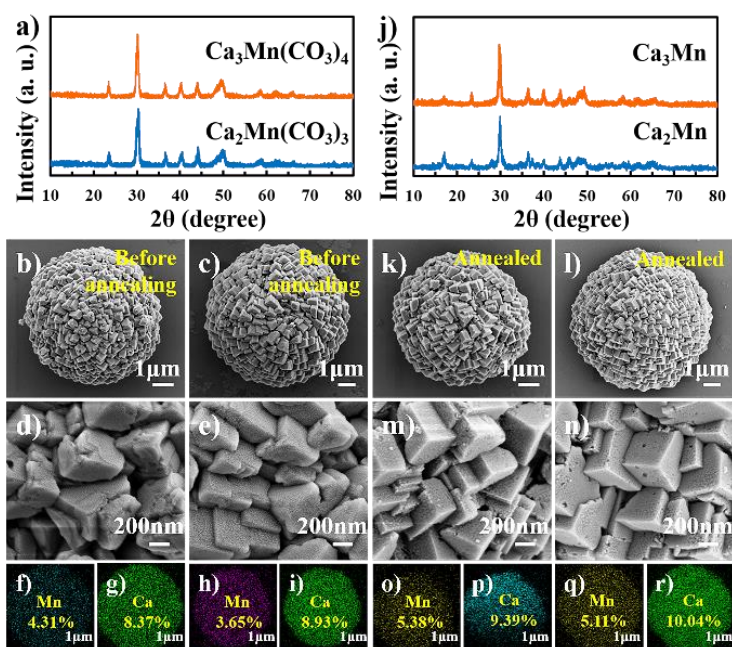

**Figure S6.** XRD patterns of (a) carbonates spheres and (j) annealed samples; SEM images of (b, d)  $\text{Ca}_2\text{Mn}(\text{CO}_3)_3$ , (c, e)  $\text{Ca}_3\text{Mn}(\text{CO}_3)_4$ , (k, m)  $\text{Ca}_2\text{Mn}$  and (l, n)  $\text{Ca}_3\text{Mn}$ . (f-i) and (o-r) show elemental mapping of Mn or Ca on above samples.

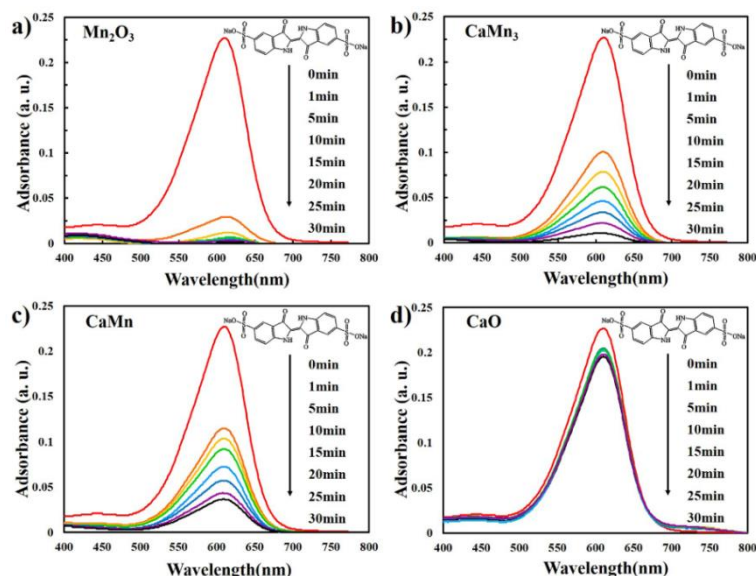

**Figure S7.** UV-Vis absorption spectra of indigo carmine solution in the presence of (a)  $\text{Mn}_2\text{O}_3$ , (b)  $\text{CaMn}_3$ , (c)  $\text{CaMn}$  and (d)  $\text{CaO}$  ( $V = 50 \text{ mL}$ ,  $\text{pH} = 6.3 \pm 0.1$ ,  $[\text{indigo carmine}] = 10 \text{ mg L}^{-1}$ , adsorbent materials  $= 0.5 \text{ g L}^{-1}$ ).

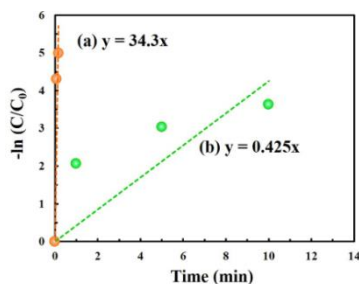

**Figure S8.** The kinetic fitting of indigo carmine degradation: (a)  $\text{CaMn}_2$  in presence of metal ions and (b)  $\text{Mn}_2\text{O}_3$  in pure indigo carmine solution. Actually, the line b did not follow the linear fitting between  $\ln(C/C_0)$  and time, because it involves of adsorption process rather than oxidant reaction. To compared with line a, the line a was still roughly fitted using the same model.

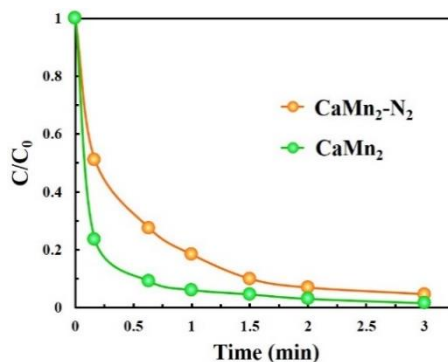

**Figure S9.** Removal of indigo carmine by  $\text{CaMn}_2$  under the air or in the presence of  $\text{N}_2$  ( $V = 50 \text{ mL}$ ,  $\text{pH} = 5.8 \pm 0.1$ ,  $[\text{indigo carmine}] = [\text{metal ions}] = 20 \text{ mg L}^{-1}$ ,  $[\text{CaMn}_2] = 0.5 \text{ g L}^{-1}$ ). It should be noted that, in our experiment, we cannot exclude the  $\text{O}_2$  completely, since there could be part of  $\text{O}_2$  dissolved during the extraction and centrifugation of aliquot sample.



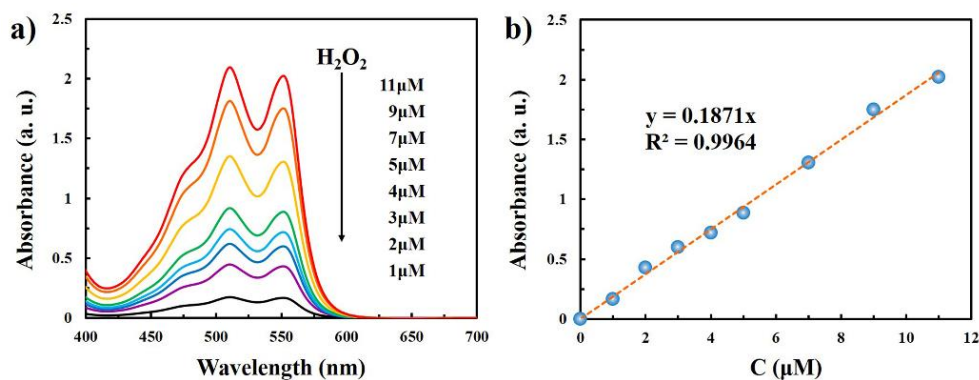

**Figure S10.** (a) UV-vis spectra and (b) the standard curve of absorbance vs  $\text{H}_2\text{O}_2$  concentration (1 to 11  $\mu\text{M}$ ) recorded at 551 nm. The curves were obtained by the addition of DPD (50  $\mu\text{L}$ ) and POD (50  $\mu\text{L}$ ) to the sampled aliquots and measuring the UV-vis spectra of the resulting solution.

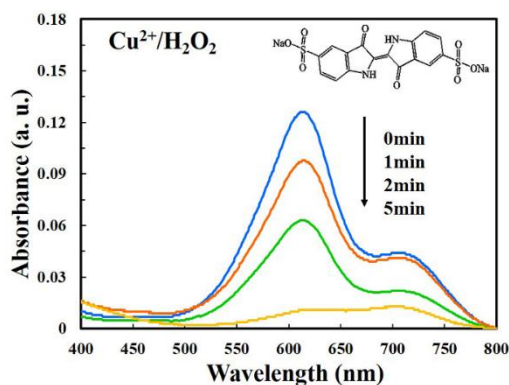

**Figure S11.** UV-vis absorption spectra of 10  $\text{mg L}^{-1}$  indigo carmine solution after treatment by homogeneous  $\text{Cu}^{2+}/\text{H}_2\text{O}_2$  (10  $\text{mg L}^{-1}$   $\text{Cu}^{2+}$ /10  $\mu\text{M}$   $\text{H}_2\text{O}_2$ ) catalyst.

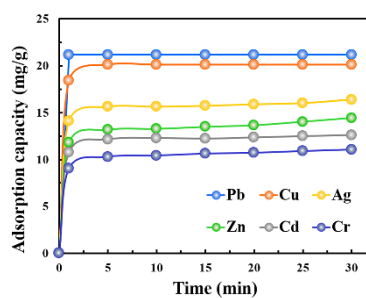

**Figure S12.** The adsorption isotherms of  $\text{Pb}^{2+}$ ,  $\text{Cu}^{2+}$ ,  $\text{Cd}^{2+}$ ,  $\text{Ag}^+$ ,  $\text{Zn}^{2+}$  and  $\text{Cr}^{3+}$  by  $\text{CaMn}_2$ .  $V = 50$  mL,  $\text{pH} = 5.8 \pm 0.1$ , [indigo carmine] = [congo red] = [orange G] = 10  $\text{mg L}^{-1}$ , [metal ions] = 10  $\text{mg L}^{-1}$ , [ $\text{CaMn}_2$ ] = 0.5  $\text{mg L}^{-1}$ .

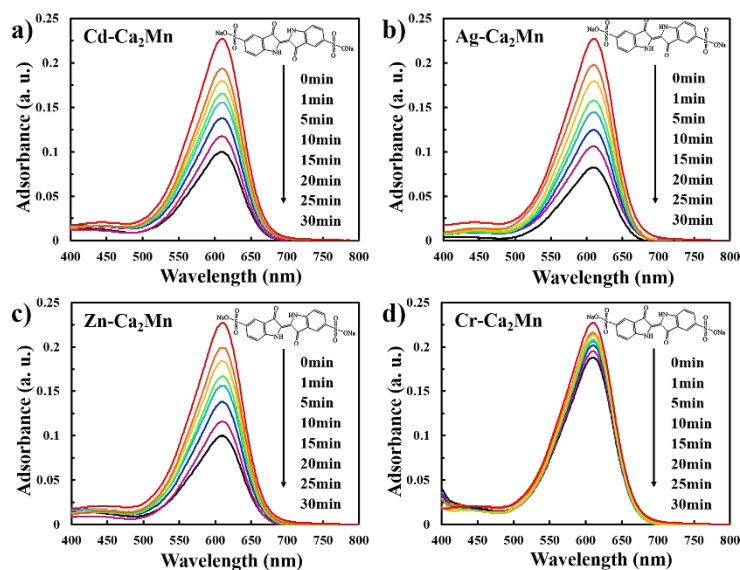

**Figure S13.** The UV-vis absorption spectra of wastewater samples containing indigo carmine after treated by (a) Cd-CaMn<sub>2</sub>, (b) Ag-CaMn<sub>2</sub>, (c) Zn-CaMn<sub>2</sub> and (d) Cr-CaMn<sub>2</sub> (V=50 mL, pH = 6.3 ± 0.1, [indigo carmine]=10 mg L<sup>-1</sup>, [Cd-CaMn<sub>2</sub>]=[Ag-CaMn<sub>2</sub>]=[Zn-CaMn<sub>2</sub>]=[Cr-CaMn<sub>2</sub>]=0.5 g L<sup>-1</sup>).

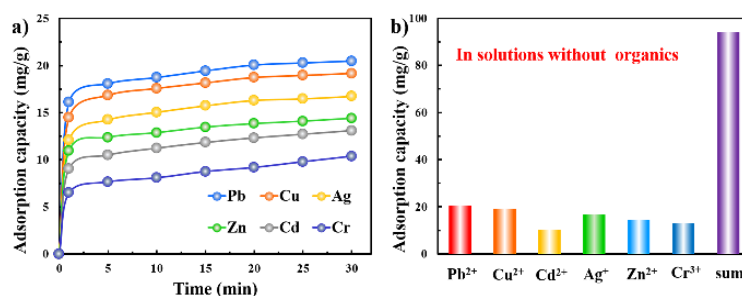

**Figure S14.** (a) The adsorption isotherms of Pb<sup>2+</sup>, Cu<sup>2+</sup>, Cd<sup>2+</sup>, Ag<sup>+</sup>, Zn<sup>2+</sup> and Cr<sup>3+</sup> by CaMn<sub>2</sub> in the organic-free solution; (b) the adsorption capacity of (a) with coexisting Pb<sup>2+</sup>, Cu<sup>2+</sup>, Cd<sup>2+</sup>, Ag<sup>+</sup>, Zn<sup>2+</sup>, Cr<sup>3+</sup> and their sum by CaMn<sub>2</sub>.

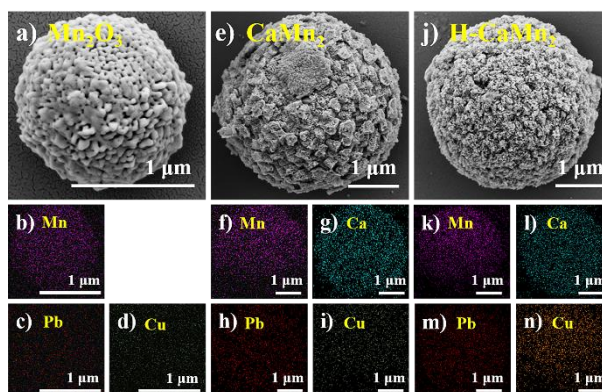

**Figure S15.** SEM images and the corresponding elemental mapping of samples after four recycling tests: (a-d) Mn<sub>2</sub>O<sub>3</sub>, (e-i) CaMn<sub>2</sub> and (j-n) H-CaMn<sub>2</sub>.

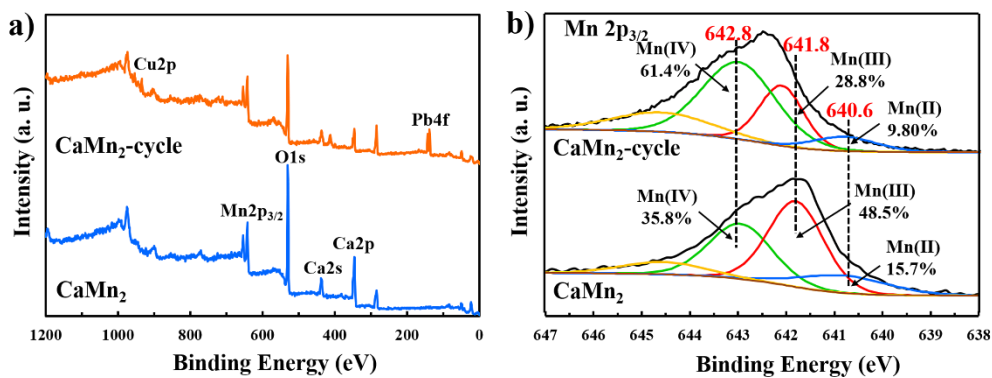

**Figure S16.** (a) XPS survey spectra of  $\text{CaMn}_2$  and  $\text{CaMn}_2\text{-cycle}$ ; (b) Corresponding high-resolution XPS spectra Mn 2p<sub>3/2</sub> of the  $\text{CaMn}_2$  and  $\text{CaMn}_2\text{-cycle}$ , respectively.

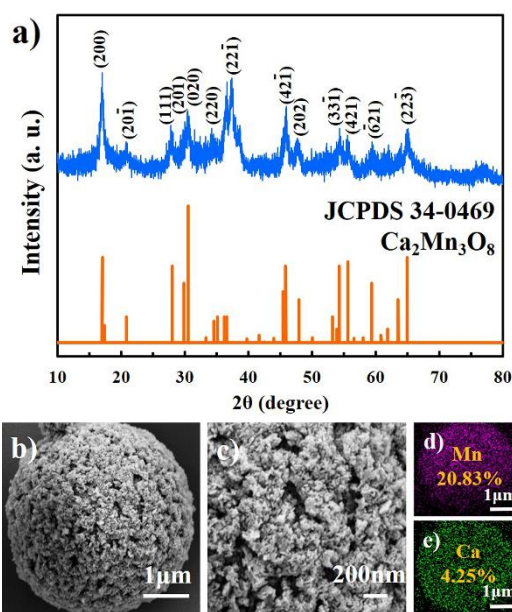

**Figure S17.** (a) XRD patterns of H- $\text{CaMn}_2$  ( $\text{CaMn}_2$  was etched by 0.01M HCl and rinsed with distilled water several times to remove the impurities); (b-c) SEM images of H- $\text{CaMn}_2$ ; (d-e) corresponding elemental mapping of Mn or Ca on the sample H- $\text{CaMn}_2$ .
